# Supplementary material
Source: publisher figshare collection journal article supplement (https://karger.figshare.com/ndownloader/files/30715151)

Supplemental Digital Content

[*1* *Results of meta-analysis on clinical characteristics* 2](#_Toc73350836)

[2 *Results of Trial Sequential Analysis* 2](#_Toc73350837)

[2.1 Supplementary figure 1 Trial Sequential Analysis and required information size for the effect of WUS for OSA 2](#_Toc73350838)

[2.2 Supplementary figure 2 Trial Sequential Analysis and required information size for the effect of WUS on AHI 3](#_Toc73350839)

[2.3 Supplementary figure 3 Trial Sequential Analysis and required information size for the effect of WUS on ODI 3](#_Toc73350840)

## Results of meta-analysis on clinical characteristics

|  | | | | |  |
| --- | --- | --- | --- | --- | --- |
| Clinical features | Number of study | OR/WMD (95%CI) | P | I2 | P for Q test |
| Age | 10 | 0.03 (-1.20-1.26) | 0.96 | 1.40% | 0.43 |
| BMI | 9 | 0.39 (-0.12-0.90) | 0.13 | 10.40% | 0.35 |
| Male | 10 | 1.27 (1.02-1.58) | **0.03** | 0 | 0.93 |
| Diabetes | 10 | 1.39 (0.90-1.35) | 0.33 | 0 | 0.90 |
| Smoking | 10 | 1.27 (1.01-1.56) | 0.04 | 0 | 0.84 |
| Hypertension | 10 | 1.03 (0.84-1.26) | 0.77 | 0 | 0.60 |
| Atrial fibrillation | 9 | 0.69 (0.52-0.92) | **0.01** | 0 | 0.64 |
| ESS | 6 | 0.51 (-0.24-1.26) | 0.18 | 0 | 0.96 |
| NIHSS | 10 | 0.12 (-0.19-0.44) | 0.43 | 26.8% | 0.20 |
| OR odd ratio, WMD weight mean difference, BMI body mass index. | | | | | |

## Results of Trial Sequential Analysis

### **Supplementary figure 1 Trial Sequential Analysis and required information size for the effect of WUS for OSA**


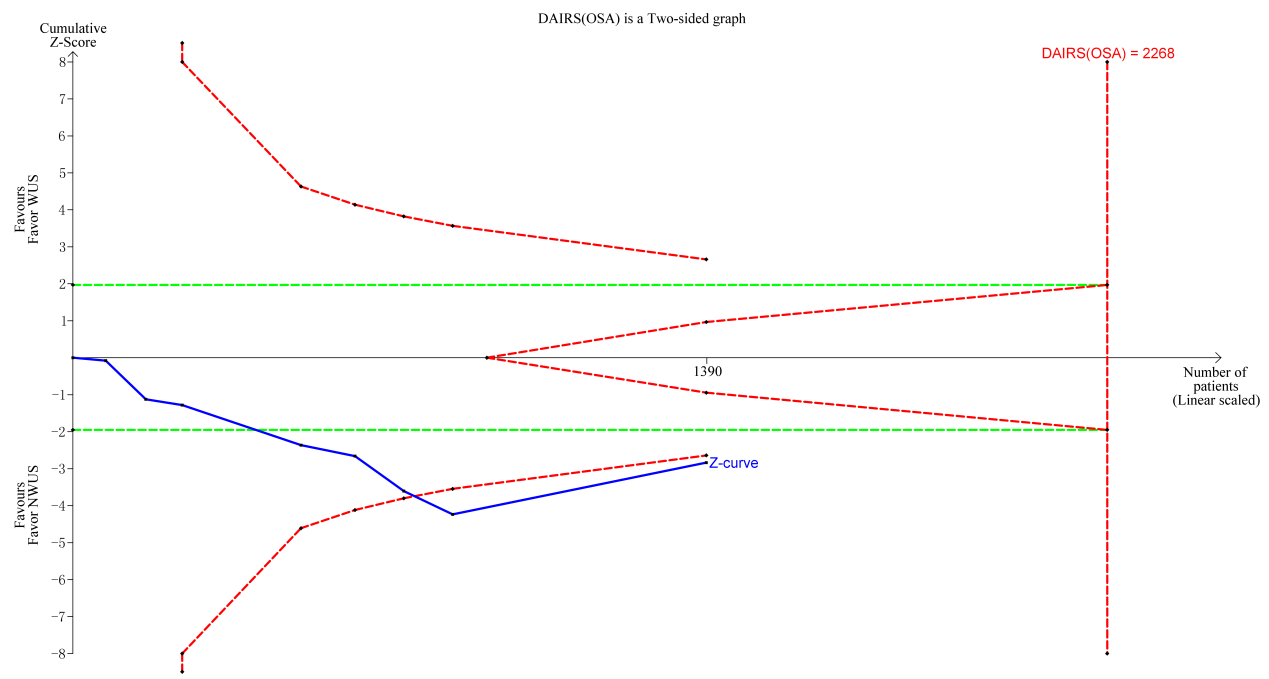


### **Supplementary figure 2 Trial Sequential Analysis and required information size for the effect of WUS on AHI**


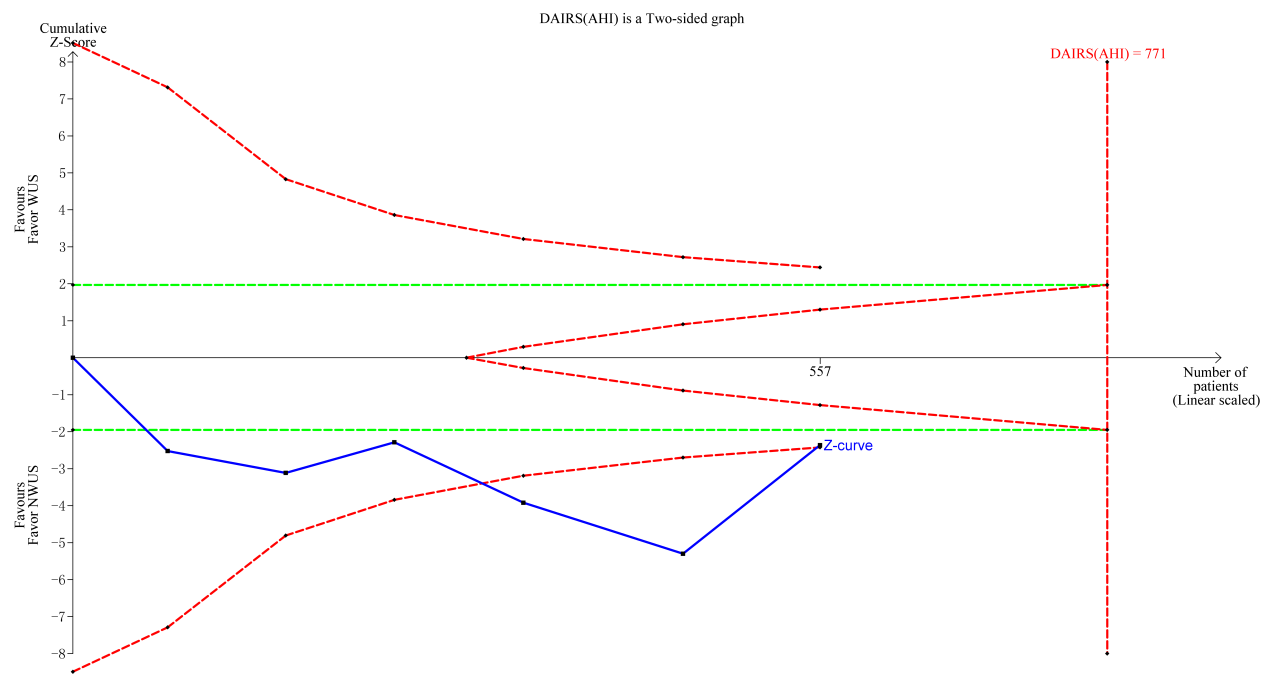


### **Supplementary figure 3 Trial Sequential Analysis and required information size for the effect of WUS on ODI**


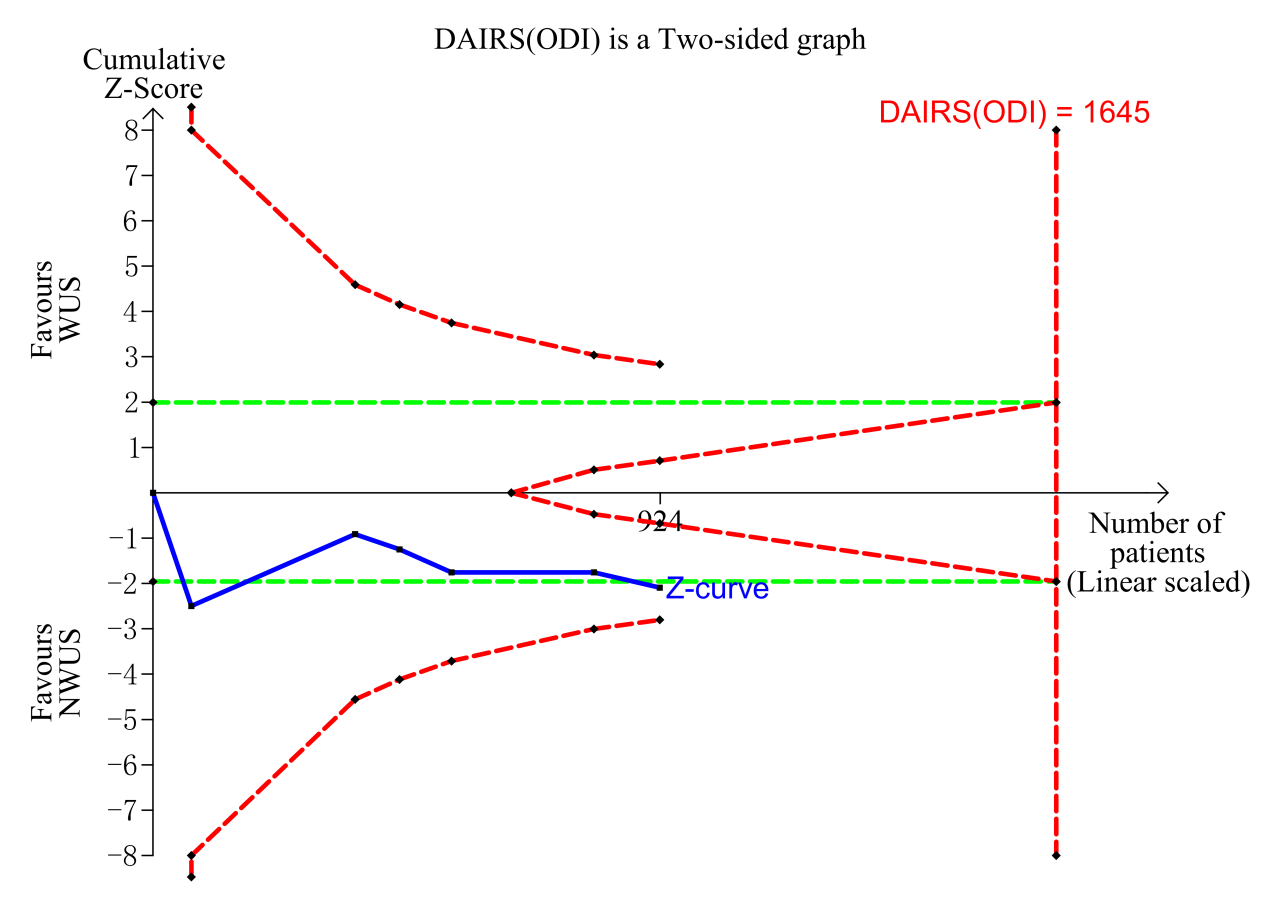

Supplement: Supplementary file 1 [file 30715151]
